# Supplementary material
Source: PubMed Central journal article supplement (PMC10865178)
Supplement: NIHMS1823413-supplement-Supplemental_Publication_Material.pdf [file NIHMS1823413-supplement-Supplemental_Publication_Material.pdf]

## Supplemental Material

This Supplemental Material has been provided by the authors to give readers additional information about their work.

### Supplement to: Chaitman BR, Cyr D, Alexander KP et al Cardiovascular and Renal Implications of Myocardial Infarction in the ISCHEMIA-CKD Trial

#### Table of Contents

|                                                                                                                   |    |
|-------------------------------------------------------------------------------------------------------------------|----|
| I. Clinical Event Committee Membership: .....                                                                     | 2  |
| Clinical Event Committee Administrative Members.....                                                              | 2  |
| II. Supplementary Tables .....                                                                                    | 3  |
| Table S1. Selected Baseline Characteristics of the Study Population by Treatment<br>Assignment .....              | 3  |
| Table S2. Distribution of First MI Events by Randomized Treatment arm and Subsequent<br>Death Within 30 Days..... | 5  |
| Table S3. Mortality According to Elevated Preprocedural Biomarkers .....                                          | 6  |
| Table S4. Time-Dependent Cox Modeling on Procedural MI Adjusted with Elevated<br>Preprocedure Biomarkers.....     | 7  |
| III. Supplementary Figure.....                                                                                    | 8  |
| Figure S1. Consort Diagram .....                                                                                  | 8  |
| VI. Primary and Secondary MI Definitions.....                                                                     | 9  |
| V. Additional Statistical Methodology .....                                                                       | 19 |

## I. Clinical Event Committee Membership:

Bernard R Chaitman (Chair) Cardiology Reviewers: Kristian Thygesen, David D Waters, Maarten L. Simoons, Eugene R. Passamani, Ileana L. Pina, Mario J. Garcia, Lisa J. Alderson, Hicham Skali, Paul J. Hauptman (2013-2017), Nicolas Danchin (2013-2016), Abhay A. Laddu (2013-2018), Neurology Reviewers: Salvator M. Cruz-Flores, Eli S. Feen

### Clinical Event Committee Administrative Members

Duke Clinical Research Institute. Chairs: Renato D. Lopes MD, Karen P. Alexander MD;  
Coordinators: Dimitrios Stournaras (Lead), John Pownall, Jill Marcus, Allegra Stone, Shaun Clifton, Megan Johnson, Kenya Stringfellow, Janelle Branch, Patricia Endsley, Joni O'Briant, Darin Sujjavanich, Shelly Duckworth, Jerry Esposito. Chair: Jeffrey S. Berger MD.  
Coordinators: Arline Roberts, Caroline Callison

## II. Supplementary Tables

Table S1. Selected Baseline Characteristics of the Study Population by Treatment Assignment

| Characteristic                                      | All Subjects<br>(N=777) | INV<br>(N=388)     | CON<br>(N=389)     |
|-----------------------------------------------------|-------------------------|--------------------|--------------------|
| <b>Demographics</b>                                 |                         |                    |                    |
| Age at Randomization (years)                        |                         |                    |                    |
| N                                                   | 777                     | 388                | 389                |
| Median (Q1, Q3)                                     | 63 (55, 70)             | 62 (55, 69)        | 64 (56, 70)        |
| Age ≥70                                             | 208/777 (26.8%)         | 93/388 (24.0%)     | 115/389 (29.6%)    |
| Male Gender                                         | 535/777 (68.9%)         | 268/388 (69.1%)    | 267/389 (68.6%)    |
| Race                                                |                         |                    |                    |
| American Indian or Alaskan Native                   | 5/747 (0.7%)            | 2/373 (0.5%)       | 3/374 (0.8%)       |
| Asian                                               | 191/747 (25.6%)         | 91/373 (24.4%)     | 100/374 (26.7%)    |
| Native Hawaiian or Other Pacific Islander           | 6/747 (0.8%)            | 2/373 (0.5%)       | 4/374 (1.1%)       |
| Black or African American                           | 63/747 (8.4%)           | 33/373 (8.8%)      | 30/374 (8.0%)      |
| White                                               | 481/747 (64.4%)         | 244/373 (65.4%)    | 237/374 (63.4%)    |
| Multiple Races Reported                             | 1/747 (0.1%)            | 1/373 (0.3%)       | 0/374 (0.0%)       |
| Hispanic or Latino                                  | 98/735 (13.3%)          | 54/372 (14.5%)     | 44/363 (12.1%)     |
| <b>Clinical History</b>                             |                         |                    |                    |
| Hypertension                                        | 711/773 (92.0%)         | 349/386 (90.4%)    | 362/387 (93.5%)    |
| Diabetes                                            | 444/777 (57.1%)         | 226/388 (58.2%)    | 218/389 (56.0%)    |
| Cigarette Smoking                                   |                         |                    |                    |
| Never Smoked                                        | 371/777 (47.7%)         | 186/388 (47.9%)    | 185/389 (47.6%)    |
| Former Smoker                                       | 322/777 (41.4%)         | 156/388 (40.2%)    | 166/389 (42.7%)    |
| Current Smoker                                      | 84/777 (10.8%)          | 46/388 (11.9%)     | 38/389 (9.8%)      |
| Prior History of CVD or PAD                         | 134/777 (17.2%)         | 71/388 (18.3%)     | 63/389 (16.2%)     |
| Prior Myocardial Infarction                         | 133/776 (17.1%)         | 62/387 (16.0%)     | 71/389 (18.3%)     |
| Prior PCI                                           | 146/777 (18.8%)         | 74/388 (19.1%)     | 72/389 (18.5%)     |
| Prior PCI or CABG                                   | 162/777 (20.8%)         | 81/388 (20.9%)     | 81/389 (20.8%)     |
| Atrial Fibrillation/Atrial Flutter                  | 69/776 (8.9%)           | 30/388 (7.7%)      | 39/388 (10.1%)     |
| Dialysis                                            | 415/777 (53.4%)         | 198/388 (51.0%)    | 217/389 (55.8%)    |
| <b>Angina and Heart Failure History</b>             |                         |                    |                    |
| Participant Has Ever Had Angina                     | 584/777 (75.2%)         | 287/388 (74.0%)    | 297/389 (76.3%)    |
| Asymptomatic Last 4 Weeks                           | 484/776 (62.4%)         | 234/388 (60.3%)    | 250/388 (64.4%)    |
| Prior Heart Failure                                 | 135/777 (17.4%)         | 65/388 (16.8%)     | 70/389 (18.0%)     |
| Ejection Fraction <sup>1</sup>                      |                         |                    |                    |
| N                                                   | 619                     | 319                | 300                |
| Median (25th, 75th)                                 | 58 (50, 64)             | 58 (50, 63)        | 58 (50, 64)        |
| Ejection Fraction <50%                              | 135/619 (21.8%)         | 74/319 (23.2%)     | 61/300 (20.3%)     |
| <b>Labs</b>                                         |                         |                    |                    |
| LDL Cholesterol (mg/dL)                             |                         |                    |                    |
| N                                                   | 727                     | 359                | 368                |
| Median (25th, 75th)                                 | 83.0 (60.0, 111.0)      | 84.0 (58.0, 111.0) | 82.0 (60.0, 113.0) |
| Estimated GFR from Enrollment (mL/min)              |                         |                    |                    |
| N                                                   | 777                     | 388                | 389                |
| Median (25th, 75th)                                 | 12 (7, 22)              | 13 (7, 23)         | 11 (7, 22)         |
| Estimated GFR <60 (mL/min)                          | 777/777 (100.0%)        | 388/388 (100.0%)   | 389/389 (100.0%)   |
| <b>ECG Findings<sup>2</sup></b>                     |                         |                    |                    |
| Q-waves: Meets UMI Criteria in 2 Leads <sup>3</sup> | 78/677 (11.5%)          | 46/336 (13.7%)     | 32/341 (9.4%)      |
| ST Segment Depression ≥0.5mm                        | 115/703 (16.4%)         | 55/349 (15.8%)     | 60/354 (16.9%)     |
| LVH, IVCD, or Pacemaker                             | 119/689 (17.3%)         | 64/344 (18.6%)     | 55/345 (15.9%)     |
| None of the Above                                   | 447/699 (63.9%)         | 223/350 (63.7%)    | 224/349 (64.2%)    |

| Characteristic                                                                                                                                                                                                                                                                                                                                                                                                                                                                                                                                                           | All Subjects<br>(N=777) | INV<br>(N=388) | CON<br>(N=389) |
|--------------------------------------------------------------------------------------------------------------------------------------------------------------------------------------------------------------------------------------------------------------------------------------------------------------------------------------------------------------------------------------------------------------------------------------------------------------------------------------------------------------------------------------------------------------------------|-------------------------|----------------|----------------|
| <sup>1</sup> Site-reported value, if available. If not available, then core-lab entered value.<br><sup>2</sup> Baseline ECG results are only reported on those ECGs with interpretable tracings as determined by the core lab.<br><sup>3</sup> Meets universal definition of MI in 2 leads in at least 1 territory (anterior, inferior, or lateral).<br>Abbreviations: CVD=cerebrovascular Disease; PAD=peripheral artery disease; LVH=left ventricular hypertrophy; IVCD=intraventricular conduction defect (QRS >120 ms); CCTA=Cardiac computed tomography angiography |                         |                |                |

In the invasive group, multivessel coronary artery disease was present in 51.3% of participants, with left anterior descending (LAD) involvement in 57.2%; 27.1% had no obstructive CAD. In the conservative group, the 3-year cumulative incidence rate of coronary angiography was 31.6% and the rate of revascularization was 19.6%

1 Table S2. Distribution of First MI Events by Randomized Treatment arm and Subsequent Death Within 30 Days

2

| MI Type                     | Primary MI Definition       |                |                | Secondary MI Definition     |                |                |
|-----------------------------|-----------------------------|----------------|----------------|-----------------------------|----------------|----------------|
|                             | All Participants<br>(N=777) | INV<br>(N=388) | CON<br>(N=389) | All Participants<br>(N=777) | INV<br>(N=388) | CON<br>(N=389) |
| No. Participants with Event | 102/777 (13.1%)             | 46/388 (11.9%) | 56/389 (14.4%) | 127/777 (16.3%)             | 67/388 (17.3%) | 60/389 (15.4%) |
| Fatal†                      | 18/102 (17.6%)              | 7/46 (15.2%)   | 11/56 (19.6%)  | 18/127 (14.2%)              | 8/67 (11.9%)   | 10/60 (16.7%)  |
| Type 1                      | 51/102 (50.0%)              | 20/46 (43.5%)  | 31/56 (55.4%)  | 50/127 (39.4%)              | 20/67 (29.9%)  | 30/60 (50.0%)  |
| Fatal                       | 12/51 (23.5%)               | 3/20 (15.0%)   | 9/31 (29.0%)   | 11/50 (22.0%)               | 3/20 (15.0%)   | 8/30 (26.7%)   |
| Type 2                      | 29/102 (28.4%)              | 12/46 (26.1%)  | 17/56 (30.4%)  | 29/127 (22.8%)              | 12/67 (17.9%)  | 17/60 (28.3%)  |
| Fatal                       | 2/29 (6.9%)                 | 1/12 (8.3%)    | 1/17 (5.9%)    | 2/29 (6.9%)                 | 1/12 (8.3%)    | 1/17 (5.9%)    |
| Type 4a                     | 5/102 (4.9%)                | 5/46 (10.9%)   | 0/56 (0.0%)    | 23/127 (18.1%)              | 21/67 (31.3%)  | 2/60 (3.3%)    |
| Fatal                       | 2/5 (40.0%)                 | 2/5 (40.0%)    | N/A            | 2/23 (8.7%)                 | 2/21 (9.5%)    | 0/2 (0.0%)     |
| Type 4b                     | 5/102 (4.9%)                | 3/46 (6.5%)    | 2/56 (3.6%)    | 5/127 (3.9%)                | 3/67 (4.5%)    | 2/60 (3.3%)    |
| Fatal                       | 0/5 (0.0%)                  | 0/3 (0.0%)     | 0/2 (0.0%)     | 0/5 (0.0%)                  | 0/3 (0.0%)     | 0/2 (0.0%)     |
| Type 4c                     | 3/102 (2.9%)                | 2/46 (4.3%)    | 1/56 (1.8%)    | 3/127 (2.4%)                | 2/67 (3.0%)    | 1/60 (1.7%)    |
| Fatal                       | 0/3 (0.0%)                  | 0/2 (0.0%)     | 0/1 (0.0%)     | 0/3 (0.0%)                  | 0/2 (0.0%)     | 0/1 (0.0%)     |
| Type 4b/c                   | 8/102 (7.8%)                | 5/46 (10.9%)   | 3/56 (5.4%)    | 8/127 (6.3%)                | 5/67 (7.5%)    | 3/60 (5.0%)    |
| Fatal                       | 0/8 (0.0%)                  | 0/5 (0.0%)     | 0/3 (0.0%)     | 0/8 (0.0%)                  | 0/5 (0.0%)     | 0/3 (0.0%)     |
| Type 5                      | 5/102 (4.9%)                | 2/46 (4.3%)    | 3/56 (5.4%)    | 13/127 (10.2%)              | 7/67 (10.4%)   | 6/60 (10.0%)   |
| Fatal                       | 2/5 (40.0%)                 | 1/2 (50.0%)    | 1/3 (33.3%)    | 3/13 (23.1%)                | 2/7 (28.6%)    | 1/6 (16.7%)    |
| Procedural (Type 4a/5)      | 10/102 (9.8%)               | 7/46 (15.2%)   | 3/56 (5.4%)    | 36/127 (28.3%)              | 28/67 (41.8%)  | 8/60 (13.3%)   |
| Fatal                       | 4/10 (40.0%)                | 3/7 (42.9%)    | 1/3 (33.3%)    | 5/36 (13.9%)                | 4/28 (14.3%)   | 1/8 (12.5%)    |
| Silent/Unrecognized         | 4/102 (3.9%)                | 2/46 (4.3%)    | 2/56 (3.6%)    | 4/127 (3.1%)                | 2/67 (3.0%)    | 2/60 (3.3%)    |

Note: No first MI events were Type 3.

† Death within 30 days of a CEC determined MI event.

3

4

5

1 Table S3. Mortality According to Elevated Preprocedural Biomarkers

2

|                                                         | Type 4a             |                          | Type 5              |                          |
|---------------------------------------------------------|---------------------|--------------------------|---------------------|--------------------------|
|                                                         | No. First MI Events | No. of Associated Deaths | No. First MI Events | No. of Associated Deaths |
| <b>Primary Definition</b>                               | 5                   | 2                        | 2                   | 2                        |
| Total No. with Missing Pre-procedure Markers            | 1/5 (20.0%)         | 0                        | 1/2 (50.0%)         | 1                        |
| Total No. with Non-missing Pre-procedure Markers        | 4/5 (80.0%)         | 2                        | 1/2 (50.0%)         | 1                        |
| No. with Pre-procedure CKDB Drawn                       | 3/4 (75.0%)         | 1                        | 0/1 (0.0%)          | 0                        |
| No. Elevated                                            | 0/3 (0.0%)          | 0                        | 0/0 (NA)            | 0                        |
| No. with Pre-procedure Troponin Drawn                   | 4/4 (100.0%)        | 1                        | 1/1 (100.0%)        | 1                        |
| No. Elevated                                            | 2/4 (50.0%)         | 1                        | 1/1 (100.0%)        | 1                        |
| No. Unique Patients with Elevated Pre-procedure Markers | 2/4 (50.0%)         | 1                        | 1/1 (100.0%)        | 1                        |
| <b>Secondary Definition</b>                             | 21                  | 10                       | 7                   | 4                        |
| Total No. with Missing Pre-procedure Markers            | 2/21 (9.5%)         | 1                        | 2/7 (28.6%)         | 1                        |
| Total No. with Non-missing Pre-procedure Markers        | 19/21 (90.5%)       | 9                        | 5/7 (71.4%)         | 3                        |
| No. with Pre-procedure CKMB Drawn                       | 18/19 (94.7%)       | 9                        | 3/5 (60.0%)         | 1                        |
| No. Elevated                                            | 2/18 (11.1%)        | 2                        | 0/3 (0.0%)          | 0                        |
| No. with Pre-procedure Troponin Drawn                   | 18/19 (94.7%)       | 9                        | 5/5 (100.0%)        | 3                        |
| No. Elevated                                            | 4/18 (22.2%)        | 3                        | 4/5 (80.0%)         | 2                        |
| No. Unique Patients with Elevated Pre-procedure Markers | 4/21 (19.0%)        | 3                        | 4/5 (80.0%)         | 2                        |

3

1 Table S4. Time-Dependent Cox Modeling on Procedural MI Adjusted with Elevated Preprocedure Biomarkers

2

| MI Type                                                                                                                                                                                                                                                                                                                                                                                                                         | No. MI Events | Event                                                     | No. Events Post-MI | HR (95% CI) <sup>†</sup><br>MI vs. No MI | P-value |
|---------------------------------------------------------------------------------------------------------------------------------------------------------------------------------------------------------------------------------------------------------------------------------------------------------------------------------------------------------------------------------------------------------------------------------|---------------|-----------------------------------------------------------|--------------------|------------------------------------------|---------|
| <b>Primary Definition</b>                                                                                                                                                                                                                                                                                                                                                                                                       |               |                                                           |                    |                                          |         |
| Procedural MI                                                                                                                                                                                                                                                                                                                                                                                                                   | 11            | All-cause Death                                           | 5                  | 2.34 (0.60, 9.09)                        | 0.2181  |
| Procedural MI                                                                                                                                                                                                                                                                                                                                                                                                                   | 11            | Cardiovascular Death                                      | 4                  | 1.63 (0.28, 9.34)                        | 0.5844  |
| Procedural MI                                                                                                                                                                                                                                                                                                                                                                                                                   | 11            | Cardiovascular Death or Hospitalization for Heart Failure | 4                  | 1.48 (0.26, 8.38)                        | 0.6600  |
| <b>Secondary Definition</b>                                                                                                                                                                                                                                                                                                                                                                                                     |               |                                                           |                    |                                          |         |
| Procedural MI                                                                                                                                                                                                                                                                                                                                                                                                                   | 39            | All-cause Death                                           | 17                 | 2.50 (1.08, 5.79)                        | 0.0322  |
| Procedural MI                                                                                                                                                                                                                                                                                                                                                                                                                   | 39            | Cardiovascular Death                                      | 16                 | 2.55 (1.02, 6.37)                        | 0.0451  |
| Procedural MI                                                                                                                                                                                                                                                                                                                                                                                                                   | 39            | Cardiovascular Death or Hospitalization for Heart Failure | 17                 | 2.34 (0.96, 5.69)                        | 0.0605  |
| <sup>†</sup> Adjusted for the ISCHEMIA CKD trial covariates: age, sex, kidney function (dialysis status and eGFR in patients not receiving dialysis), left ventricular ejection fraction, diabetes, and elevated pre-procedural biomarkers CK-MB or Troponin (categorical classification as elevated biomarkers, no elevated biomarkers, missing biomarker data). Continuous variables are modeled as restricted cubic splines. |               |                                                           |                    |                                          |         |

3

4

1 III. Supplementary Figure

2

3 Figure S1. Consort Diagram

4

5

6

7

8

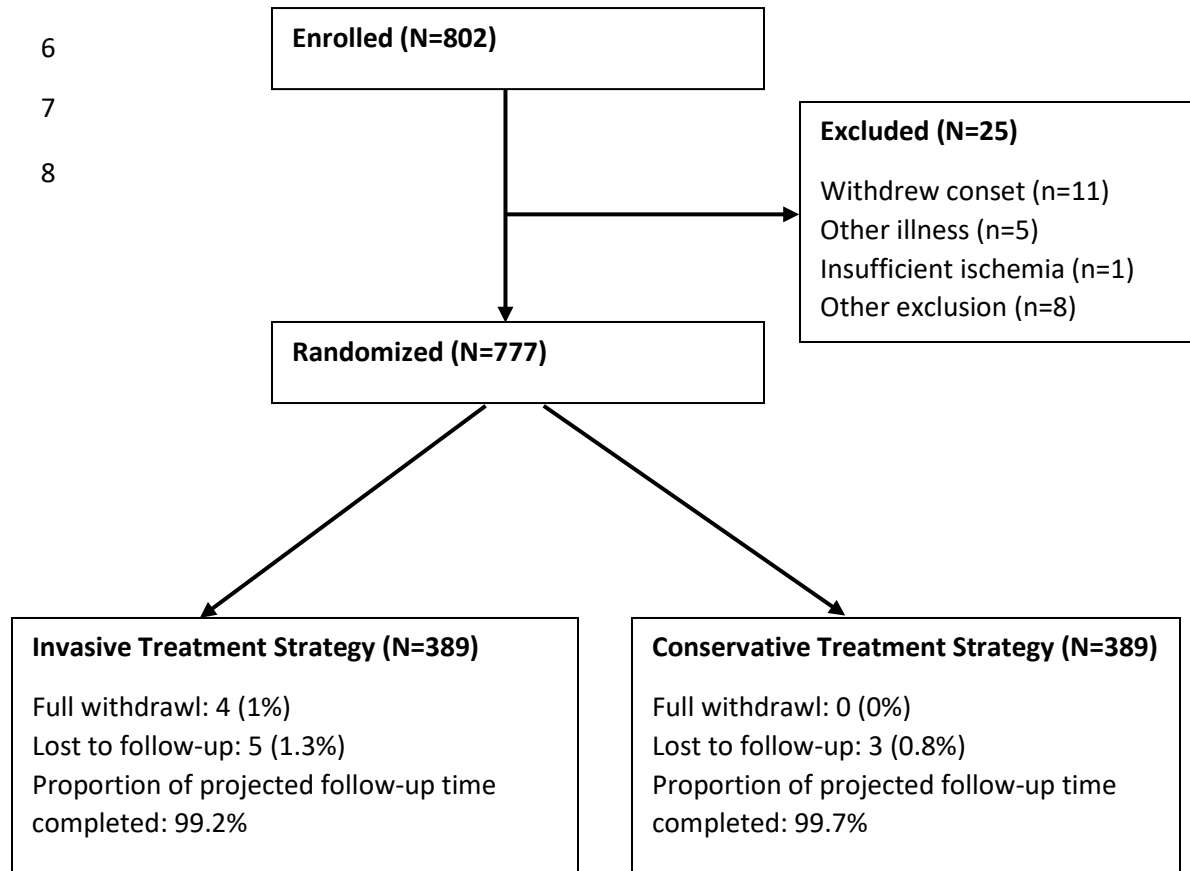



## VI. Primary and Secondary MI Definitions

Two versions of MI will be adjudicated in ISCHEMIA: a primary definition and secondary definition. Each definition includes a hierarchy of markers and threshold values as well as a set of rules for diagnosing MI when one or more key elements of the medical record are missing.

The Primary Definition is based upon the Universal Definition of MI, but relies upon site- reported MI decision limits for troponin (which may or may not be the same as the manufacturer 99%URL), and has selected unique marker criteria for MI after PCI or CABG (Type 4a, 5).

The Secondary Definition is also based upon the Universal Definition of Myocardial Infarction, but specifically uses the 99%URL from the assay manufacturer's package insert (which may or may not be the site's MI decision limit) and uses the same supporting criteria (eg. angiographic and ECG) as the UMI definition. All MI events will be classified based on the Universal MI classification system as follows:

- Type 1: non-procedure MI
- Type 2: Secondary MI
- Type 3: Sudden Death MI
- Type 4a: MI related to PCI
- Type 4b: MI related to stent thrombosis

- 1 • Type 4c: MI related to stent restenosis
- 2 • Type 5: MI related to CABG
- 3 • Silent MI

4

5 **Non-procedure MI (Types 1, 2, 4b, 4c)**

6 Diagnosis of non-procedure MI will be satisfied by a clinical setting consistent with acute myocardial ischemia and any one or more of  
7 the following criteria:

8

9 Marker elevation, as outlined below and at least 1 of the following:

- 10 • Symptoms of ischemia, usually lasting > 20 minutes in duration
- 11 • New ischemic ST and/or T wave and/or Q-wave ECG changes, or new LBBB, as described below
- 12 • Imaging evidence of new loss of viable myocardium in comparison to the baseline imaging test
- 13 • Angiographic evidence of intracoronary thrombus, stent thrombosis (4b) or high- grade in-stent restenosis ( $\geq 50\%$ ) (4c)

14

15 Marker data not available and at least 2 of the following:

- 16 • New ischemic ST and/or T wave and/or Q-wave ECG changes, or new LBBB, as described below
- 17 • Imaging evidence of new loss of viable myocardium in comparison to the baseline imaging test
- 18 • Angiographic evidence of intracoronary thrombus.

1  
2  
3  
4  
5  
6  
7  
8  
9  
10  
11  
12  
13  
14  
15  
16  
17  
18

Autopsy evidence of a fresh myocardial infarction as stand-alone criterion

**Non-procedure MI Marker Criteria**

Troponin, including high-sensitivity troponin, is the preferred biomarker and takes precedence over CK-MB for both definitions.

Primary Definition: Preferentially uses a troponin threshold value reported as MI Decision Limit or the Upper Limit of Normal (ULN).  
Marker elevation is defined as troponin > ULN/MI decision limit. If troponin is not done or not available, then CK-MB > ULN will qualify.  
If both troponin and CK-MB are not done or not available, then CK > 2 x ULN will qualify.

Secondary Definition: Preferentially uses a troponin threshold reported by the manufacturer, namely, the manufacturer 99th percentile.  
Marker elevation is defined as troponin > 99th percentile. If the troponin 99th percentile is not reported, then troponin > ULN will qualify.  
If troponin is not done or not available, then CK-MB > ULN will qualify. If both troponin and CK-MB are not done or not available, then  
CK > 2 x ULN will qualify.

**Non-procedure MI ECG Criteria**

ECG criterion is considered to be met if any of the following:

1 ST elevation: New ST elevation at the J-point in two contiguous leads with the cutpoints:  
2  $\geq 0.2$  mV in men  $>$ age 40 and  $\geq 0.25$ mV in men  $<$ 40 years or  $\geq 0.15$  mV in women in leads V2–V3 and/or  $\geq 0.1$  mV in other leads, or  
3 new LBBB.

4  
5 Any new Q-wave in leads V2–V3  $\geq 0.02$  seconds or QS complex in leads V2 and V3 or Q-wave  $\geq 0.03$  seconds and  $\geq 0.1$  mV deep or  
6 QS complex in leads I, II, aVL, aVF, or V4–V6 in any two leads of a contiguous lead grouping (I, aVL, V6; V4–V6; II, III, and aVF) or R-  
7 wave  $\geq 0.04$  seconds in V1–V2 and R/S  $\geq 1$  with a concordant positive T- wave in the absence of a conduction defect.

8  
9 ST depression and/or T-wave changes, new horizontal or down-sloping ST depression  
10  $\geq 0.05$  mV in two contiguous leads; and/or T-wave inversion  $\geq 0.1$  mV in two contiguous leads. The ST-T wave criteria only apply in the  
11 absence of findings that would preclude ECG analysis such as LBBB, LVH with repolarization abnormalities, pre-excitation and  
12 pacemakers.

13

#### 14 ***Silent MI***

15 This event includes evidence of new silent Q-wave MI detected during routine protocol or clinically obtained ECG follow-up. Silent MI  
16 events will be classified as a type 1 MI.

17

#### 18 ***Sudden death MI (Type 3)***

1 MI events in which a presentation consistent with infarction is present but the patient dies before the biomarkers are drawn or within  
2 the first few hours of the event before the biomarkers become positive. Sudden unexpected cardiac death, including cardiac arrest,  
3 often with symptoms suggestive of myocardial ischemia, accompanied by presumably new ST-segment elevation, or new LBBB, or  
4 evidence of fresh thrombus in a coronary artery by angiography and/or at autopsy, but death occurring before blood samples could be  
5 obtained, or at a time before the appearance of cardiac biomarkers in the blood.

6

### 7 ***PCI-Related MI (Type 4a)***

#### 8 **Primary Definition**

9 CK-MB is the preferred biomarker and takes precedence over troponin. For subjects with normal baseline biomarker level pre-PCI, peri-  
10 PCI MI requires a rise in CK-MB to >5-fold the ULN (or a rise in troponin to >35 times the MI Decision Limit/ULN, when CK-MB is  
11 unavailable) within 48 hours post-PCI. If pre-PCI cardiac markers (CKMB or cTn) are elevated, they must be stable or falling as indicated  
12 by two samples at least 6 h apart. The post-PCI CKMB level should reflect a rise of >20% over pre-PCI levels. In addition to biomarker  
13 criteria, peri-PCI MI requires at least one of the following:

- 14 • Post-procedure angiographic TIMI 0/1 flow in a major coronary artery or a side branch with reference vessel diameter  $\geq 2.0$  mm  
15 which had TIMI 2-3 flow at baseline, or TIMI 2 flow in a major coronary artery or a side branch with reference vessel diameter  
16  $\geq 3.0$  mm which had TIMI 3 flow at baseline or Type C dissection (NHLBI classification) or greater in the target vessel.
- 17 • New ECG changes (ST segment elevation or depression  $>0.1$  mV in 2 contiguous leads), new pathologic Q-waves in  $\geq 2$   
18 contiguous leads, or new persistent LBBB present on a post-PCI ECG obtained at least 30 minutes and up to 48 hours post

1 procedure in the absence of any intervening coronary event between the time of the PCI procedure and the ECG showing  
2 changes.

3  
4 NOTE: A type 4a MI will be diagnosed with a rise in CK-MB to >10-fold the ULN (or when CK-MB is unavailable, a rise in troponin to  
5 >70 times the MI Decision Limit/ULN) as a biomarker elevation only criterion. If biomarkers are missing, a type 4a MI will be diagnosed  
6 if BOTH ECG criteria (new ST elevation or depression, Q-wave criteria, or new and persistent LBBB) AND angiographic criteria above  
7 are present. If pre-PCI cardiac markers are missing, they will be assumed to be normal in those without a preceding event.

### 9 **Secondary Definition**

10 Elevation of troponin values >5 X 99th percentile URL within 48 hours post-PCI in patients with normal baseline troponin values pre-  
11 PCI AND a rise of troponin values >20% if the baseline values are elevated pre-PCI and are stable or falling. If the troponin 99th  
12 percentile is not available, the MI Decision Limit / ULN may be used. If troponins are not available, CKMB elevation >5 X ULN will be  
13 used.

14  
15 In addition to biomarker criteria, peri-PCI MI requires at least one of the following:

- 16 • Symptoms suggestive of myocardial ischemia ( $\geq 20$  min)
- 17 • New ischemic ST changes or new pathological Q waves. (see "ECG Criteria" above) Note the UMI definition uses  $\geq 0.05$  mV of  
18 STD whereas the ISCHEMIA definition uses  $\geq 0.1$  mV for PCI related ECG criteria

- 1 • Angiographic evidence of a flow limiting complication, such as loss of patency of a side branch, persistent slow-flow or no re-  
2 flow, embolization, or Type C dissection (NHLBI classification) or greater in the target vessel.
- 3 • Imaging evidence of new loss of viable myocardium or new regional wall motion abnormality.

4  
5 NOTE: A type 4a MI will be diagnosed with a rise in troponin to >70 times the 99th percentile URL (or, when troponin is unavailable, a  
6 rise in CK-MB to >10 times the ULN) as a biomarker elevation only criterion. If biomarkers are missing, a type 4a MI will be diagnosed  
7 if BOTH ECG criteria (new ST elevation or depression, Q-wave criteria, or new and persistent LBBB) AND angiographic criteria above  
8 are present. If pre- PCI cardiac markers are missing, they will be assumed to be normal in those without a preceding event.

### 9 10 ***CABG-Related MI (Type 5)***

#### 11 **Primary Definition**

12 CK-MB is the preferred serum biomarker and takes precedence over cTn. For subjects with normal baseline biomarker level pre-CABG,  
13 peri-CABG MI requires a rise in CK-MB to >10-fold the ULN (or a rise in troponin to >70 times MI Decision Limit/ULN when CK-MB is  
14 unavailable) within 48 hours post-CABG. In addition to biomarker criteria, peri-CABG MI requires at least one of the following:

- 15  
16 • A new substantial wall motion abnormality by cardiac imaging (CEC assessed), except new septal and apical abnormalities.  
17 The CEC will have latitude in determining whether a new wall motion abnormality is “substantial” in the context of the clinical  
18 event.

- 1       • New pathologic Q-waves in  $\geq 2$  contiguous leads or new persistent LBBB is present on post CABG ECG obtained day 3 post  
2 CABG, or hospital discharge, whichever comes earlier in the absence of any intervening coronary event between the time of the  
3 CABG procedure and the ECG showing changes.

4

5 NOTE: A type 5 MI will be diagnosed with a rise in CK-MB to  $>15$ -fold the ULN (or when CK-MB is unavailable a rise in troponin to  
6  $>100$  times the MI Decision Limit/ULN) as a biomarker elevation only criterion. If biomarkers are missing, an MI will be diagnosed if  
7 the ECG criteria (New pathologic Q waves or new persistent LBBB) AND new substantial wall motion abnormality are BOTH present.  
8 If pre-CABG cardiac markers are missing, they will be assumed to be normal in those without a preceding event.

9

#### 10 **Secondary Definition**

11 Elevation of troponin values  $>10 \times$  99th percentile URL within 48 hrs post-CABG in patients with normal baseline troponin values ( $\leq$   
12 99th percentile URL). If the troponin 99th percentile is not available, the ULN may be used. If troponins are not available, CKMB elevation  
13  $>10 \times$  ULN will be used. In addition to biomarker criteria, peri-CABG MI requires at least one of the following:

14

- 15       • New pathologic Q waves or new LBBB
- 16       • Angiographic evidence of new graft or new native coronary artery occlusion.
- 17       • Imaging evidence of new loss of viable myocardium.

18



1 NOTE: A type 5 MI will be diagnosed with a rise in troponin to >100 times the 99th percentile URL (or when troponin is unavailable a  
2 rise in CK-MB to >15 times the ULN) as a biomarker elevation only criterion. If biomarkers are missing, an MI will be diagnosed if the  
3 ECG criteria (New pathologic Q waves or new persistent LBBB) AND new substantial wall motion abnormality are BOTH present. If  
4 pre-CABG cardiac markers are missing, they will be assumed to be normal in those without a preceding event.

5

### 6 ***Complicated MI and Large MI***

7 *Complicated MI:* Prognostically important MIs may also be identified as those with complications such as hemodynamic instability,  
8 cardiogenic shock, drop in EF >10% from baseline, electrical instability with life-threatening VT or VF, or heart failure complicating MI.  
9 Complicated myocardial infarctions may typically require ICU care, invasive support (eg. intubation, IABP, PA catheters) and  
10 intravenous medications (eg. inotropes or antiarrhythmics.) CEC adjudicators will identify complicated MIs based upon the information  
11 available to them in the eCRF and source documents.

12

- 13 • Hemodynamic instability: requiring fluids, inotropic or vasopressor support to maintain end-organ perfusion. May progress to  
14 shock if also accompanied by end-organ underperfusion.
- 15 • Shock: Compromise of end-organ perfusion due to hemodynamic instability and sustained hypotension. Often manifested by  
16 hypotension, increased creatinine, shock liver, and decreased mentation.
- 17 • Life-threatening VT or VF: Requiring antiarrhythmics or defibrillation to return sinus rhythm. Transient runs of VT (eg. during  
18 reperfusion) are not associated with hemodynamic instability are not usually considered life-threatening.

- 1       • Decreased EF  $\geq$  10%: EF assessment during the event which indicates a drop from prior assessments (eg. EF 30% from  
2       previous EF 55%)
- 3       • HF in the setting of an MI is defined on the basis of the physician's decision to treat HF with an intravenous (IV) diuretic, IV  
4       inotropic agent or IV vasodilator and at least 1 of the following:
- 5             • Presence of pulmonary edema or pulmonary vascular congestion on chest radiograph believed to be of cardiac cause.  
6             • Rales greater than 1/3 up the lung fields believed to be due to HF.  
7             • Pulmonary Capillary Wedge Pressure (PCWP) or left ventricular end diastolic pressure (LVEDP) greater than 18 mmHg.  
8             • Dyspnea, with documented paO<sub>2</sub> less than 80 mmHg on room air or O<sub>2</sub> saturation less than 90% on room air, without  
9       significant lung disease

10

11   *Large MI:* A T4A or T5 MI was considered large if it met the biomarker elevation only biomarker criteria and for non-procedure MI's if  
12   the peak cTn > 70 times the upper reference limit. The size of MI will be assessed by examining peak levels of cardiac biomarkers as  
13   a continuous function.

14

## 1 V. Additional Statistical Methodology

2

3 Imputation: To maximize the amount of information each covariate provides to a covariate-adjusted analysis, multiple imputation was  
4 used to impute missing covariate data. The statistical techniques used for multiple imputation include chained equations and predictive  
5 mean matching (PMM). PMM using chained equations does not require too many assumptions and the imputations do not change  
6 much when those assumptions are violated (Buuren S. Flexible imputation of missing data. Boca Raton, FL: Chapman & Hall/CRC;  
7 2012.). PMM first involves fitting an ordinary linear model on an outcome variable using all covariates of interest. Predictions of the  
8 outcome variable can be determined based on the model where continuous covariates are expanded into restricted cubic splines that  
9 usually have 3 knots. For a given covariate, PMM then replaces a missing value with an observed value whose predicted value is very  
10 close to the predicted value for the missing value. PMM does not assume a conditional distribution form for the covariate being imputed.

11

12

13
